# Supplementary material for: Association of Prescription Co-payment With Adherence to Glucagon-Like Peptide-1 Receptor Agonist and Sodium-Glucose Cotransporter-2 Inhibitor Therapies in Patients With Heart Failure and Diabetes
Source: PubMed Central journal article supplement (PMC10236237; doi:10.1001/jamanetworkopen.2023.16290), 2023-06-01
Supplement: jamanetwopen-e2316290-s002.pdf [file jamanetwopen-e2316290-s002.pdf]

## Data Sharing Statement

Essien. Association of Prescription Co-payment With Adherence to Glucagon-Like Peptide-1 Receptor Agonist and Sodium-Glucose Cotransporter-2 Inhibitor Therapies in Patients With Heart Failure and Diabetes. *JAMA Netw Open*. Published June 01, 2023.  
doi:10.1001/jamanetworkopen.2023.16290

### Data

**Data available:** No
